# Differential Expression of Estrogen Receptor- $\beta$ and Estrogen Receptor- $\alpha$ in the Rat Ovary

MADHABANANDA SAR AND FRANK WELSCH

*Chemical Industry Institute of Toxicology, Research Triangle Park, North Carolina 27709-2137*

## ABSTRACT

Immunohistochemical localization of two estrogen receptor (ER) subtypes, ER $\beta$  and ER $\alpha$ , was performed in neonatal, early postnatal, immature, and adult rats to determine whether ER $\alpha$  and ER $\beta$  are differentially expressed in the ovary. ER $\beta$  and ER $\alpha$  were visualized using a polyclonal anti-ER $\beta$  antibody and a monoclonal ER $\alpha$  (ID5) antibody, respectively. Postfixed frozen sections and antigen-retrieved paraffin sections of the ovary revealed nuclear ER $\beta$  immunoreactivity (IR) in granulosa cells, which was prevented when peptide-adsorbed antibody was used instead. In immature and adult rat ovaries, ER $\beta$  was expressed exclusively in nuclei of granulosa cells of primary, secondary, and mature follicles. Atretic follicle granulosa cells showed only weak or no staining. No specific nuclear ER $\beta$  IR was detected in thecal cells, luteal cells, interstitial cells, germinal epi-

thelium, or oocytes. In neonatal rat ovary, no ER $\beta$  expression was found. In ovaries of 5- and 10-day-old rats, weak ER $\beta$  IR was observed in granulosa cells of primary and secondary follicles, but no staining was detected in the primordial follicles. ER $\alpha$  protein exhibited a differential distribution in the ovary with no detectable expression in the granulosa cells but evidence of ER $\alpha$  IR in germinal epithelium, interstitial cells, and thecal cells. In the oviduct and uterus, IR for ER $\alpha$ , but not ER $\beta$ , was found in luminal epithelium, stromal cells, muscle cells, and gland cells. Our present study demonstrates that ER $\beta$  and ER $\alpha$  proteins are expressed in distinctly different cell types in the ovary. The exclusive presence of ER $\beta$  in granulosa cells implies that this specific new subtype of ER $\beta$  mediates some effects of estrogen action in the regulation of growth and maturation of ovarian follicles. (*Endocrinology* 140: 963–971, 1999)

ESTROGEN influences the growth, differentiation, and functions of female and male reproductive tissues by acting through the estrogen receptors (ER) (1, 2), which are members of the superfamily of nuclear receptors (3, 4). Biochemical, autoradiographic, and immunocytochemical techniques have been used to detect ER in a variety of tissues (5–9). Biochemical and autoradiographic studies have previously demonstrated the presence of ER in brain, pituitary, and peripheral reproductive tissues, including the ovary and testis (10–14). Although specific binding of estradiol was found in granulosa cells (15–18) ER has not been localized to rat granulosa cells using receptor antibodies.

Recently, a novel ER complementary DNA (cDNA), designated and now known as the ER $\beta$  subtype, was cloned from the rat prostate (19) and mouse ovary (20). This cDNA is distinct from the classical ER cDNA (21), which is now recognized as the ER $\alpha$  subtype. The ER $\beta$  protein has highly conserved DNA- and ligand-binding domains compared with the ER $\alpha$  subtype (19, 22). The ER $\beta$  protein shares with the ER $\alpha$  protein about 95% homology in the DNA-binding domain and 55% homology in the C-terminal ligand-binding domain. Ligand binding assays have also shown that the ER $\beta$  protein binds estrogen with an affinity and specificity similar to those of the ER $\alpha$  protein (22). RT-PCR analysis and *in situ* hybridization revealed the highest levels of ER $\beta$  messenger RNA (mRNA) expression in the rat ovary and prostate (19, 22). Recent investigations also indicate the existence of several isoforms of rat ER $\beta$  mRNA (23, 24), one of which is

known as ER $\beta$ 2 and is expressed in the ovary, prostate, and other tissues (24). Rat ovary expresses both ER $\beta$  and ER $\alpha$  mRNA, but the ER $\beta$  mRNA is localized predominately in the granulosa cells of small, growing, and preovulatory follicles (25). However, limited information exists about the specific cellular localization of ER $\beta$  and ER $\alpha$  protein in rat ovary. The present study describes the differential distribution of ER $\beta$  and ER $\alpha$  in rat ovary, as visualized by differential immunocytochemical reactivity using a polyclonal antibody to synthetic ER $\beta$  peptide and a monoclonal antibody, ID5, which recognizes ER $\alpha$ , respectively. The results demonstrated that ER $\beta$  and ER $\alpha$  proteins were differentially expressed in rat ovary. ER $\beta$  was detected in granulosa cells, whereas ER $\alpha$  was localized in thecal cells, interstitial gland cells, and germinal epithelium.

## Materials and Methods

### Animals

Timed pregnant Sprague-Dawley rats were purchased from Charles River Laboratories, Inc. (Raleigh, NC). The rats were fed NIH-07 rodent chow and water *ad libitum*. Neonatal (1 day old), postnatal (5–10 days old), immature (21–23 days old), and adult (60–70 days old) female offspring were used in the experiments. The animals were housed in humidity- and temperature-controlled rooms with a 12-h light, 12-h dark photoperiod. Neonatal and postnatal pups were kept with their dams until experimental use. The animal experiments were approved by the institutional animal care and use committee of the Chemical Industry Institute of Toxicology.

### Tissue preparation

One-, 5-, and 10-day-old female rat pups were killed by decapitation, whereas immature and adult female rats were killed by CO<sub>2</sub> asphyxiation. The reproductive tract tissues, including ovary, oviduct, and uterus, were immediately removed and either frozen (see below) or fixed in buffered formalin for 6–24 h. Tissue sections were prepared from three to five rats in each age group.

Received May 29, 1998.

Address all correspondence and requests for reprints to: Madhabananda Sar, Ph.D., Chemical Industry Institute of Toxicology, 6 Davis Drive, P.O. Box 12137, Research Triangle Park, North Carolina 27709-2137. E-mail: sar@ciit.org.

For frozen sections, tissues were placed on Tissue-Tek OCT (Sakura Finetek, USA, Inc., Torrance, CA) mounts, frozen in isopentane precooled in liquid nitrogen ( $-180^{\circ}\text{C}$ ), and stored in a deep freezer ( $-80^{\circ}\text{C}$ ) until cryosectioning. Frozen sections of 8- $\mu\text{m}$  thickness were cut and processed for immunocytochemistry. Fixed tissues were embedded in paraffin, and 5- $\mu\text{m}$  sections were cut and processed for immunocytochemistry.

### Histology

The classification of developmental stages of follicles were followed as previously described for the mouse and hamster ovaries (26, 27) and later adopted for the rat ovary (28).

### Immunocytochemistry

The frozen sections were air-dried and then fixed for 5 min at room temperature in a mixture of 4% paraformaldehyde, 10% sucrose, and 0.1 M sodium phosphate buffer, pH 7.2. The paraffin sections were first deparaffinized and then treated with 3%  $\text{H}_2\text{O}_2$  in PBS (pH 7.6) for 5 min. These steps were followed by heating the sections in a microwave oven (three times, 4 min each time) for antigen retrieval using a citrate buffer, pH 5.5–5.7 (1:10 dilution; HIER buffer, Ventana Medical Systems, Inc., Santa Barbara, CA). Postfixed frozen sections were treated with 3%  $\text{H}_2\text{O}_2$  in PBS for 3 min to reduce endogenous peroxidase activity and then incubated with 0.2% Triton X-100 for 5 min. Postfixed frozen sections and antigen-retrieved paraffin sections were processed for immunostaining by the avidin-biotin peroxidase method as previously described (8). The sections were incubated overnight at 4  $^{\circ}\text{C}$  with ER $\beta$  antibody (see below for details), preadsorbed ER $\beta$  antibody, and monoclonal antibody, ID5 (Dako Corp., Carpinteria, CA; see below for details). ER $\beta$  antibody was used at a concentration of 4  $\mu\text{g}/\text{ml}$  in frozen sections and 10  $\mu\text{g}/\text{ml}$  in paraffin sections. Monoclonal antibody was used at a concentration of 0.1–0.2  $\mu\text{g}/\text{ml}$ . The optimal working dilution of antibody was determined by incubating sections with varying concentrations of antibody, ranging from 0.1–10  $\mu\text{g}/\text{ml}$ . Sections were washed in 1 mM PBS (pH 7.6) followed by incubation with the secondary antibody goat antirabbit IgG or horse antimouse IgG and Elite avidin-biotin peroxidase at a concentration of either 1:100 or 1:200 for 30–60 min each at room temperature. After a 5-min wash, the sections were treated with liquid diaminobenzidine (Biogenex, San Ramon, CA) followed by a 10-min wash in PBS and then counterstained with hematoxylin. The immunostained slides were evaluated with an Olympus Corp. Vanox-S photomicroscope (Melville, NY). For comparison of immunostains, sections of ovaries from rats of different age groups were processed for immunostaining in parallel with the standard procedure described. The intensity of immunostaining was semiquantitatively designated as weak, medium, strong, or no staining.

### Antibody

**ER $\beta$ .** A rabbit polyclonal antibody (PAI-310) raised against a synthetic peptide corresponding to the C-terminal amino acid residues 467–485 of rat ER $\beta$  was purchased from Affinity BioReagents, Inc. (Golden, CO). Characterization of this antibody by Western blot and gel supershift was limited to rat ER $\beta$  being overexpressed in COS-7 cells. Preadsorbed ER $\beta$  antibody was prepared by incubating 4–10  $\mu\text{g}/\text{ml}$  ER $\beta$  antibody with 16–40  $\mu\text{g}$  synthetic peptide for 24 h at 4  $^{\circ}\text{C}$ .

**ER $\alpha$ .** Monoclonal antibody (clone 1D5; Dako Corp.) binds to ER and localizes ER in target tissues by both immunofluorescence and immunoperoxidase (29). In the present study, we compared immunostaining of the rat uterus using the monoclonal (Dako Corp.) antibody with that produced by a polyclonal antibody ER (MC20, Santa Cruz Biotechnology, Inc., Santa Cruz, CA). MC-20 is an affinity-purified rabbit polyclonal antibody raised against a peptide corresponding to amino acids 580–599 mapping at the carboxyl-terminus of the ER of mouse origin.

## Results

### ER $\beta$ immunocytochemistry in female reproductive organs

In both frozen and paraffin sections of the ovary, nuclear ER $\beta$  immunoreactivity (IR) was observed in certain follicular

cells, but not in others (Figs. 1, A, B, and C; 2A; and 3). The pattern of ER $\beta$  distribution appeared similar with the two types of tissue preparation, but the intensity of ER $\beta$  IR was stronger in frozen tissue sections (Fig. 1) than in paraffin-embedded tissue sections (Fig. 3). The specificity of the ER $\beta$  antibodies in the immunohistochemical reaction was ascertained by incubating adjacent tissue sections with the antibody preadsorbed with the synthetic peptide used as immunogen. Preadsorbed ER $\beta$  antibody did not reveal nuclear granulosa cell immunostaining in frozen sections (Fig. 1D) or in paraffin sections (Fig. 2B). Similarly, normal rabbit serum did not show nuclear immunoreaction (data not shown).

In ovaries of immature (21- to 23-day-old) rats, nuclear ER $\beta$  staining was observed in granulosa cells of the primary, secondary, and mature follicles (Figs. 1, A and B, and Fig. 3, A and B). The intensity of ER $\beta$  immunoreactivity was stronger in secondary and mature follicles than in primary follicles. Within the follicles, some granulosa cells did not show nuclear staining with ER $\beta$  antibody. Thecal cells, interstitial gland cells, oocytes, and germinal epithelium revealed a lack of nuclear ER $\beta$  immunoreactivity. However, interstitial gland cells showed cytoplasmic staining, which was not completely blocked but was reduced when preadsorbed ER $\beta$  antibody was used. In the uterus (data not shown) and oviduct (Fig. 1A), ER $\beta$  IR was not detected in luminal, stromal, gland, or muscle cells.

In both immature (21- to 23-day-old) and adult (60-day-old) female rats, nuclear ER $\beta$  expression was observed in granulosa cell nuclei of the growing follicles at all stages from primary to secondary and mature follicles (Fig. 3), including preantral and antral follicles. The intensity of ER $\beta$  immunostaining in granulosa cells of atretic follicles varied considerably. Some completely lacked IR, whereas in others, granulosa cells of the basal cell layers showed IR, and granulosa cells toward the center of the atretic follicle revealed no staining (data not shown). The atretic follicles were identified, as they consisted of granulosa cells with pyknotic nuclei and were clearly seen in adjacent ovarian sections stained with hematoxylin and eosin. Thecal cells and oocytes showed no nuclear staining; corpora lutea cells and interstitial gland cells had some cytoplasmic staining that was not completely blocked, as judged from sections incubated with preadsorbed ER $\beta$ .

### ER $\beta$ expression in the developing reproductive organs

On postpartum day 1, histological examination of the ovary showed oocytes, differentiating stromal cells, and pregranulosa cells. Immunocytochemistry performed on sections of 1-day-old rat ovaries revealed no immunostaining with ER $\beta$  antibody in either oocytes or differentiating stromal cells and pregranulosa cells (Fig. 4A). From postpartum days 1–10, the ovary progressively increased in size; in ovaries from 5- and 10-day-old rats, primordial follicles, intermediate follicles, and growing follicles (primary and secondary) were recognizable (Fig. 4, B and C). At this age a small number of granulosa cells in the growing follicles showed nuclear ER $\beta$  staining (Fig. 4B), although the intensity of the IR appeared to be weaker than that in cells from immature and adult rat ovaries. No ER $\beta$  staining was de-



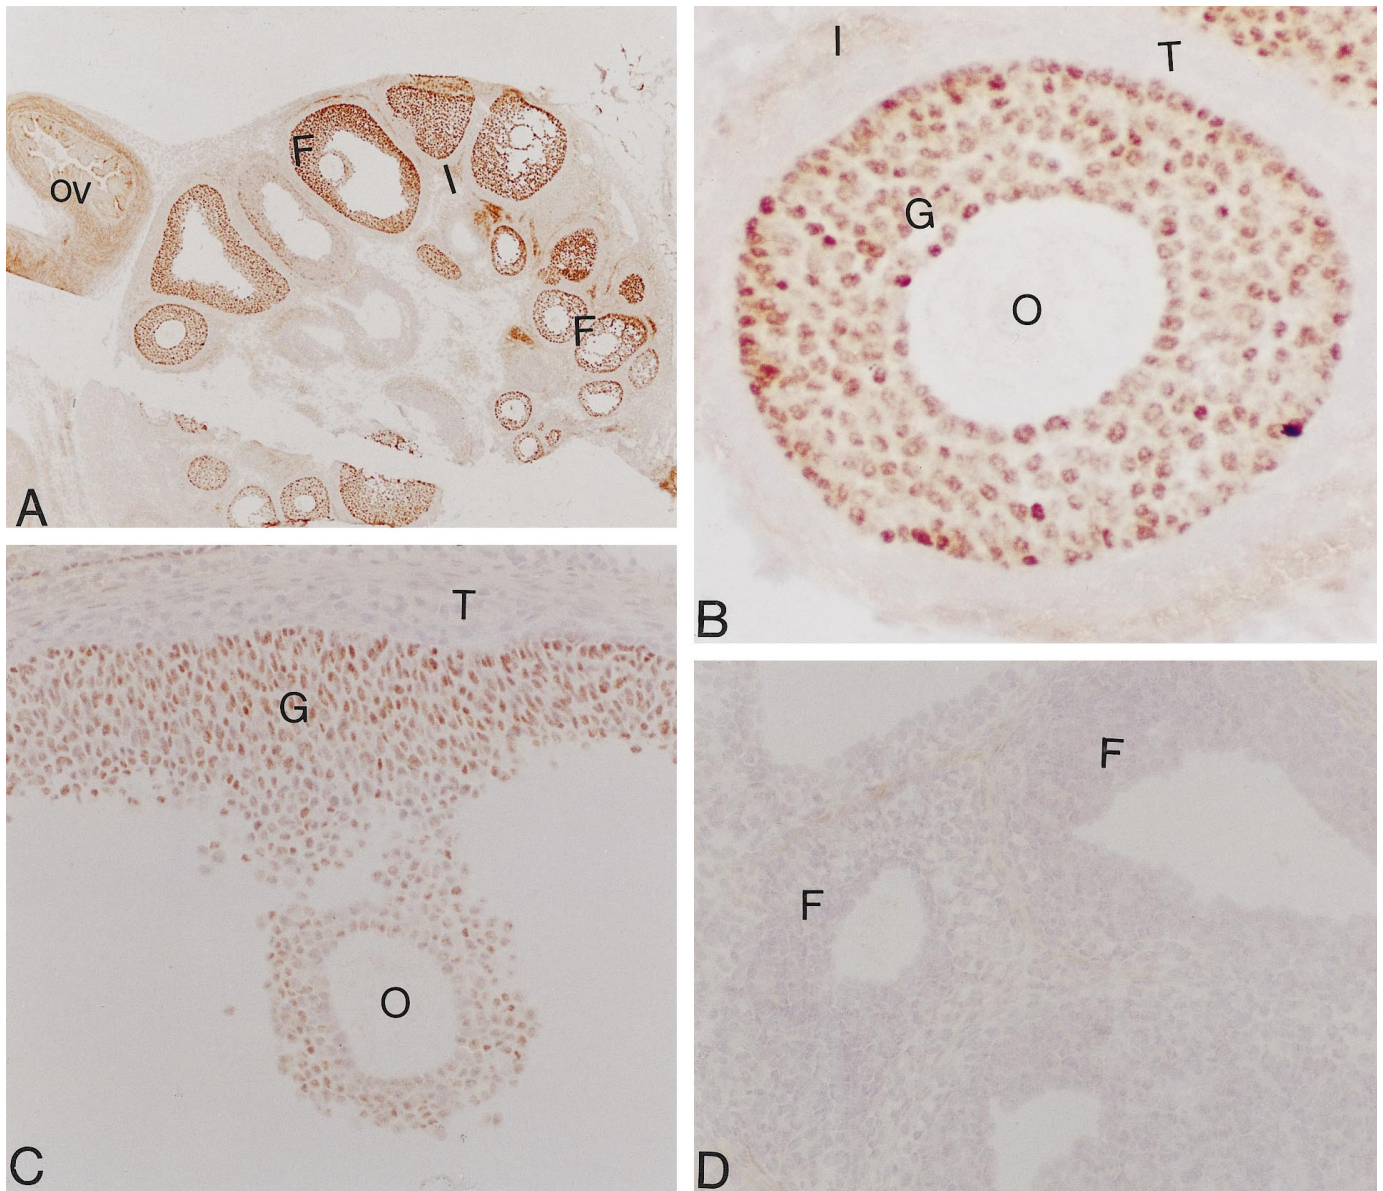

FIG. 1. Localization of ER $\beta$  in 23-day-old (A and B) and 60-day-old (C and D) rat ovary. Frozen sections of rat ovary were incubated with PAI P310 ER $\beta$  antibody (A–C) or preadsorbed ER $\beta$  antibody with the peptide immunogen (D). Note the immunostaining in follicles (F), specifically in nuclei of granulosa cells (G; B, C) and the lack of staining in thecal cells (T), interstitial cells (I), and oocytes (O). No staining was observed when peptide-adsorbed antibody was used (D). Counterstained with hematoxylin; magnification,  $\times 110$  (A),  $\times 800$  (B), and  $\times 440$  (C and D).

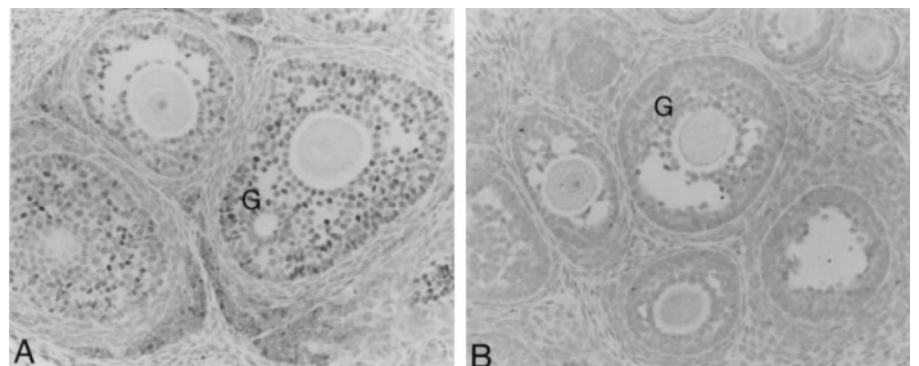

FIG. 2. Specificity of ER $\beta$  localization in 21-day-old rat ovary. Paraffin sections were stained with ER $\beta$  antibody (A) or ER $\beta$  antibody preadsorbed with the peptide immunogen (B). Note nuclear ER $\beta$  in granulosa cells (G), which was prevented when peptide-preadsorbed antibody was used. Counterstained with hematoxylin; magnification,  $\times 295$ .



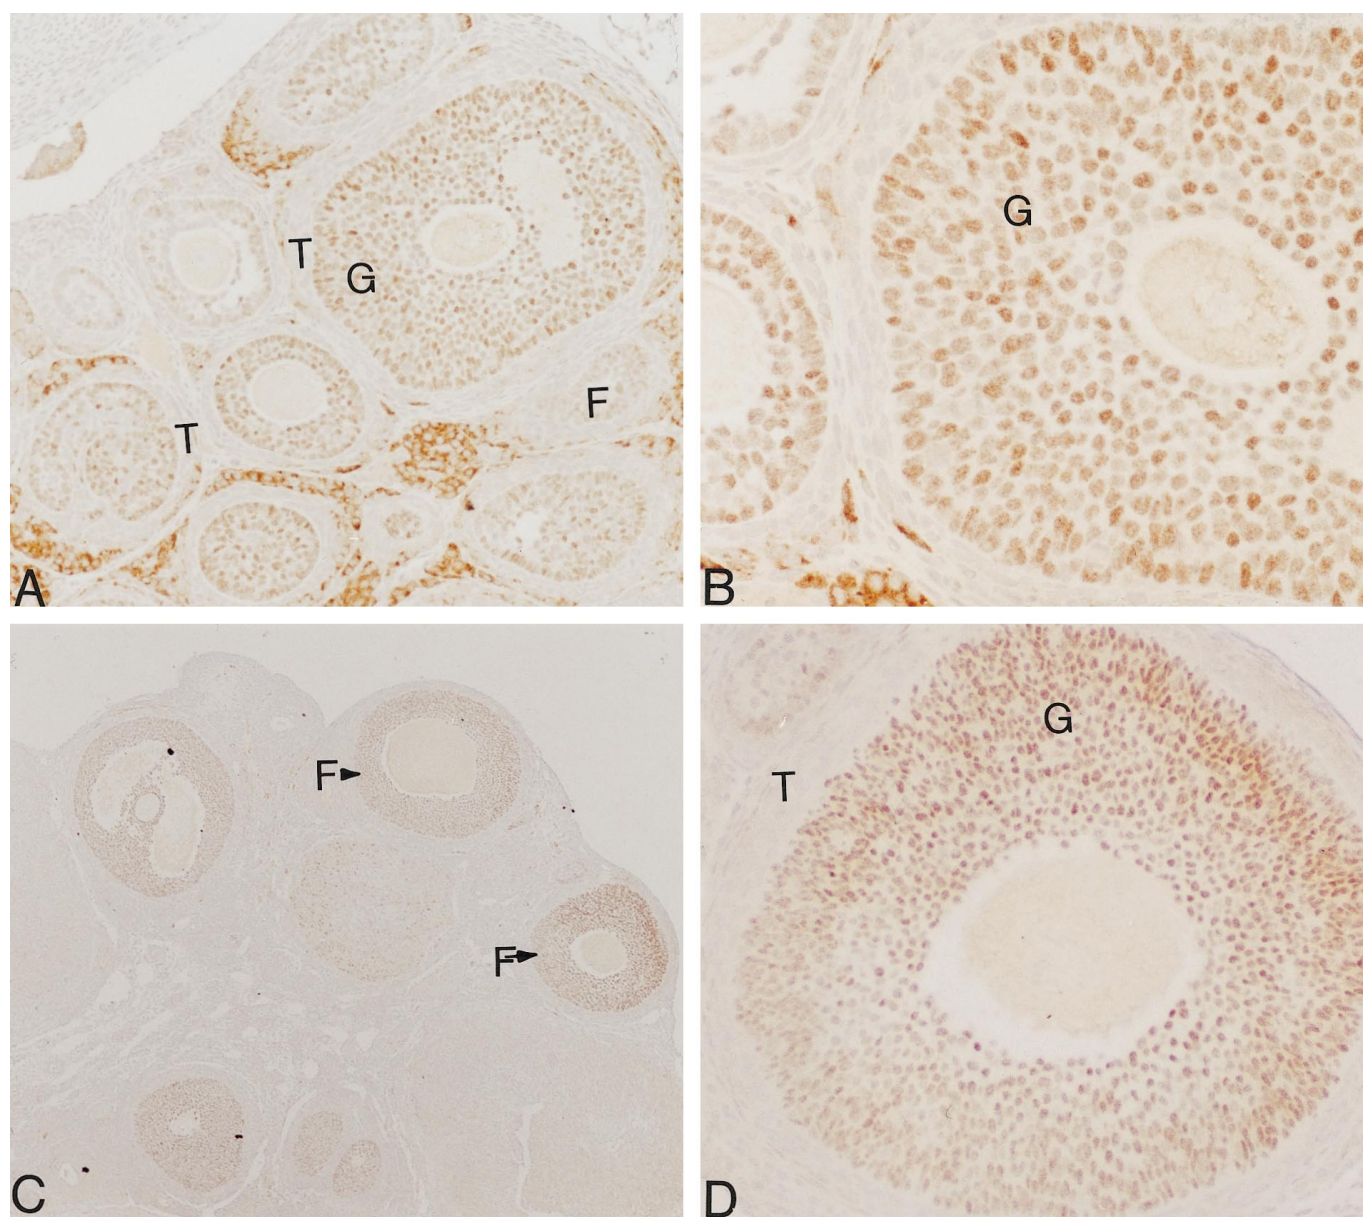

FIG. 3. Localization of ER $\beta$  in 21-day-old (A and B) and 60-day-old (C and D) rat ovary. Paraffin sections were immunostained with ER $\beta$  antibody after antigen retrieval using citrate buffer as described in *Materials and Methods*. Intense immunostaining was detected in follicles (F; primary, secondary, and mature) at different stages of development. Specific nuclear staining was observed in nuclei of granulosa cells (G). Some cytoplasmic staining could be seen in interstitial gland cells, but no staining was detectable in thecal cells (T). Counterstained with hematoxylin; magnification,  $\times 360$  (A and D),  $725$  (B), and  $110$  (C).

tected in primordial follicles, but very weak staining was seen in differentiating granulosa cells of the intermediate follicles (Fig. 4C). Oocytes, stromal cells, and germinal epithelium had no ER $\beta$  IR. Similarly, neither the uterus nor the oviduct of day 1 and day 10 rats revealed ER $\beta$  expression (data not shown).

To further compare the levels of ER $\beta$  expression in developing ovaries, we examined immunostaining intensities after incubation with two different concentrations (5 and 10  $\mu\text{g}/\text{ml}$ ) of ER $\beta$  antibody. At the 5  $\mu\text{g}/\text{ml}$  concentration of ER $\beta$  antibody, no staining was detected in granulosa cells of 5-day-old rats, but weak staining was observed in 10-day-old rats, whereas a moderate or medium intensity staining was

detected in immature and adult rats. At 10  $\mu\text{g}/\text{ml}$  antibody, a strong intensity of IR was observed in immature and adult rat ovaries. Although ER $\beta$  expression was clearly seen in ovaries of 5- to 10-day-old rats, there were few positively stained granulosa cells, which revealed light to medium intensities of IR.

#### ER $\alpha$ immunocytochemistry in female rat reproductive organs

Immunocytochemistry with the ID5 monoclonal antibody revealed nuclear ER $\alpha$  expression in the uterus and oviduct of immature and adult rats (Fig. 5, A and F). The staining was



FIG. 4. Localization of ER $\beta$  in rat ovary on postnatal day 1 (A), day 5 (B), and day 10 (C). Paraffin sections were immunostained with ER $\beta$  antibody. A, In postnatal day 1 ovary, no staining was observed in cells of the undifferentiated follicles or the primordial follicles. B, On postnatal day 5 ovary, granulosa cells (G) of the primary follicles (intermediate and growing) showed weak to moderate IR. C, In postnatal day 10 ovaries, when follicles have grown in size, ER $\beta$  immunoreactivity showed increased intensity in granulosa cells (G). Note that the follicles (P, primary; S, secondary) at different stages of growth showed variable intensity of immunoreactivity. Germinal epithelium (E), thecal cells (T), and interstitial gland cells (I) did not show specific staining. Counterstained with hematoxylin; magnification,  $\times 430$  (A),  $\times 800$  (B), and  $\times 730$  (C).

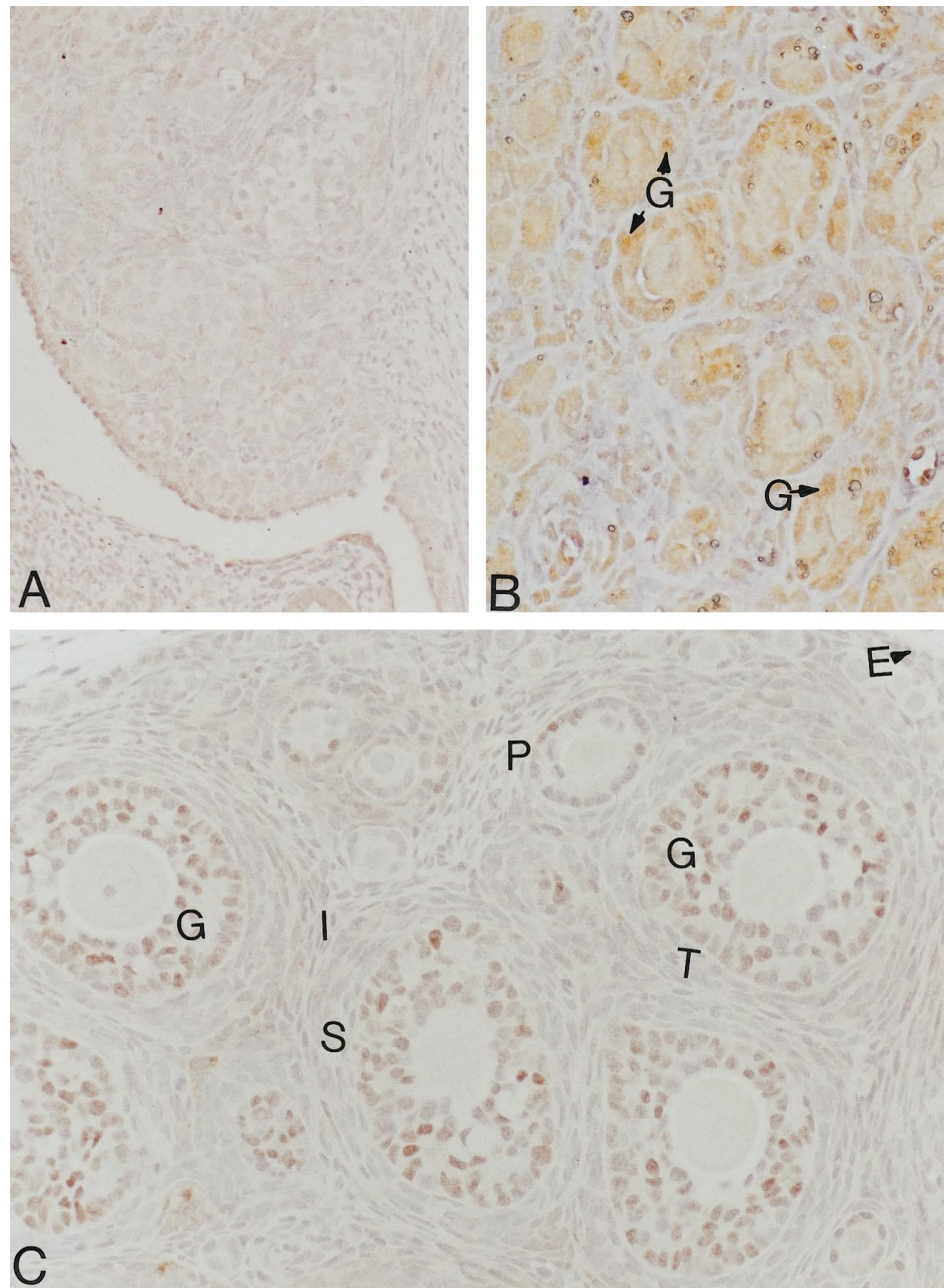

specific, as adjacent sections of ovary and uterus did not show a positive immunoreaction when normal mouse IgG was used instead. A strong nuclear ER $\alpha$  IR was observed in luminal epithelial cells and gland cells as well as in stroma and muscle cells (Fig. 5F). The staining was also detected in the nuclei of these tissue sections, where the polyclonal MC-20 antirabbit ER antibody was used in place of the ID-5 monoclonal antibody (data not shown).

In the ovary of immature (21- to 23-day-old) rats, ER $\alpha$  nuclear staining was observed in thecal cells, interstitial gland cells, and germinal epithelium (Fig. 5, A–C). In contrast, no nuclear ER $\alpha$  IR was observed in granulosa cells of primary, secondary, and mature follicles. Similarly, granulosa cells of the same maturational stage follicles in adult rat ovary did not show nuclear ER $\alpha$  staining (Fig. 5, D and E).

Corpora lutea cells also lacked nuclear staining with ER $\alpha$  antibody (Fig. 5D). In contrast, thecal cells, interstitial gland cells (Fig. 5, C–E), and germinal epithelial cells (Fig. 5, A and B) showed nuclear ER $\alpha$  staining. In both immature and adult rats, ER $\alpha$  staining was not detected in oocytes (O).

In neonatal rats, uterine stroma and muscle cells showed intense nuclear ER $\alpha$  staining, whereas luminal epithelial cells lacked IR (data not shown). In the oviduct, stromal cells, muscle cells, and luminal epithelial cells displayed strong nuclear staining. In the ovary, the germinal epithelium as well as differentiating stromal cells revealed specific nuclear ER $\alpha$  staining, whereas no reaction product was observed in pregranulosa cells and oocytes (Fig. 6A). In ovaries of 5- and 10-day-old rats, nuclear ER $\alpha$  staining was not detected in granulosa cells of primordial and growing follicles (Fig. 6,

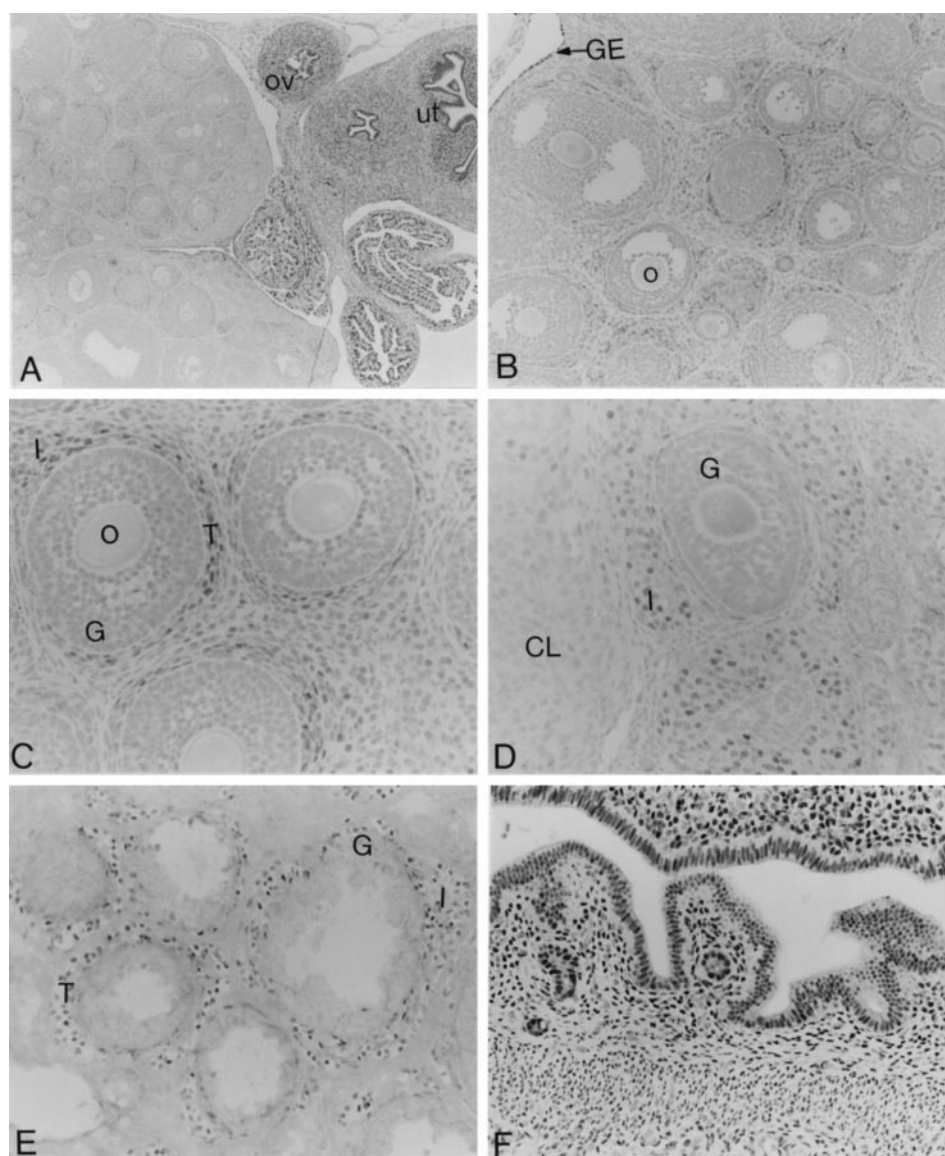

FIG. 5. Localization of ER $\alpha$  in ovary (A–E), oviduct (ov; A), and uterus (ut; A and F) of 21-day-old (A, B, C, and F) and 60-day-old (D and E) rats. Paraffin (A, B, C, D, and F) and frozen sections (E) were immunostained with a monoclonal antibody ID5. Intense ER $\alpha$  staining was detected in luminal epithelium and muscle cells of the oviduct (A) and uterus (A and F) as well as in stromal and gland cells of the uterus (A and F). Weak staining was observed in the ovary (A–E). In the ovary, no ER $\alpha$  was detected in granulosa cells (G) of primary, secondary, and mature follicles. In contrast, germinal epithelium (GE), thecal cells (T), and interstitial gland cells (I) showed nuclear ER $\alpha$ . Paraffin (D) and frozen (E) sections revealed similar staining. No ER $\alpha$  was detected in corpus luteum (CL) and oocytes (O). Counterstained with hematoxylin; magnification,  $\times 70$  (A),  $\times 150$  (B), and  $\times 375$  (C–F).

B–D). In contrast, ER $\alpha$  staining was seen in the nuclei of some stromal cells and germinal epithelial cells (Fig. 6, B and C), but weak staining was detected in a few thecal cells (Fig. 6D).

### Discussion

The present study unequivocally demonstrates ER $\beta$  expression by immunocytochemistry in the rat ovary. Granulosa cells of primary, secondary, and mature follicles showed nuclear ER $\beta$  IR at different stages of follicular development. The immunodetection of ER $\beta$  in the rat ovary reported here is in general agreement with the nuclear localization of [ $^3$ H]estradiol in granulosa cells demonstrated previously both by autoradiography (13, 14) and by the binding of [ $^3$ H]estradiol to granulosa cells in biochemical assays (16, 30). Localization of the ER $\beta$  protein in granulosa cells also shows a parallel distribution with the high ER $\beta$  mRNA expression recently demonstrated by *in situ* hybridization and RT-PCR (19, 22) and agrees with a recent report describing ER $\beta$  localization to granulosa cells in the rat ovary (31). We also

observed that the P310 ER $\beta$  antibody recognized immunoreactive ER $\beta$  in epithelial cells of rat prostate and epididymis (32, 33), in agreement with the expression of ER $\beta$  mRNA in these tissues reported previously (22).

In our immunocytochemical study, the distribution of ER $\beta$  protein differed from that of ER $\alpha$  in the rat ovary. ER $\beta$  was expressed in nuclei of granulosa cells but not in thecal cells or in interstitial gland cells and germinal epithelium. In contrast, ER $\alpha$  was localized in thecal cells, interstitial gland cells, and germinal epithelium, but not in granulosa cells. Immunoreactive ER $\beta$  was not detectable in either the uterus or the oviduct, although RT-PCR analysis has shown moderate expression of ER $\beta$  mRNA in the uterus. The lack of ER $\beta$  IR in the uterus may be attributable to low antigenicity of the primary antibody, which could not detect low levels of the ER $\beta$  protein. A recent report also indicates the presence of low levels of ER $\beta$  mRNA in the uterus and oviduct of mice (34). With the application of novel and more sensitive antibodies against ER $\beta$  protein, whether thecal cells, corpora



FIG. 6. Localization of ER $\alpha$  in rat ovary on postnatal day 1 (A), day 5 (B), and day 10 (C). Paraffin sections were stained with a monoclonal antibody. No staining was observed in granulosa cells (G) of primary and growing follicles on days 5 and 10. ER $\alpha$  was detected in undifferentiated stromal cells (A), connective tissue cells (A–C), and germinal epithelium (C and D). Weak IR was also seen in certain thecal cells (T), but not in others, in day 10 ovary (C). Counterstained with hematoxylin; magnification,  $\times 450$  (A and C) and  $\times 600$  (B and D).

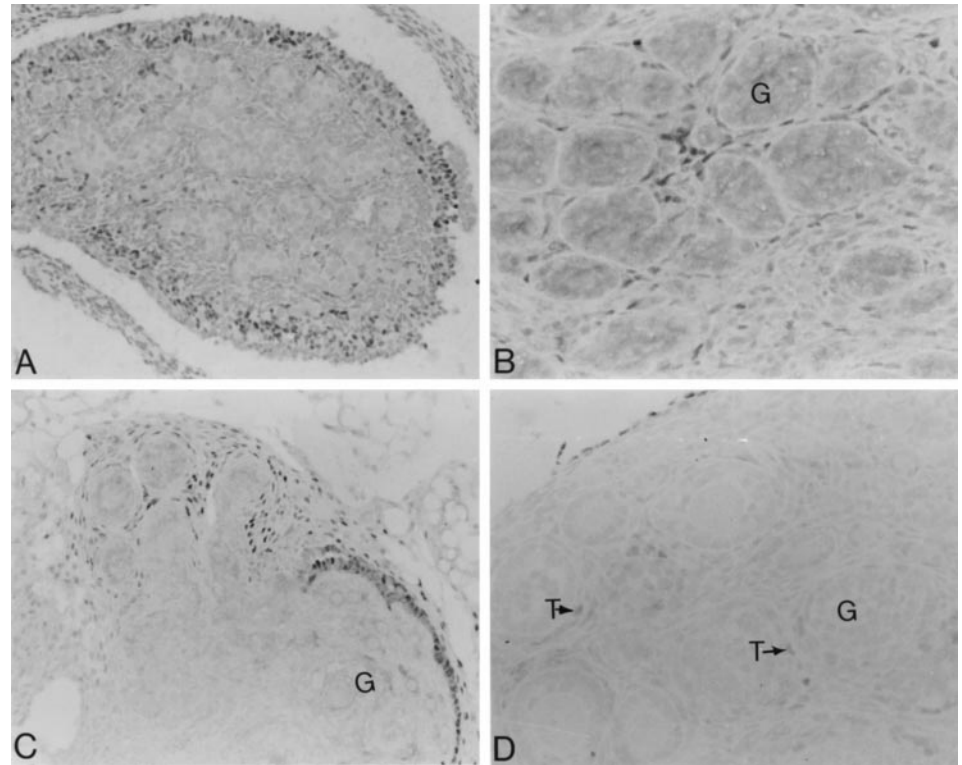

lutea, and interstitial gland cells as well as uterine tissue express ER $\beta$  remains to be determined.

ER $\alpha$  and ER $\beta$  have similar binding affinities for estradiol (22), and nuclear localization of [ $^3$ H]estradiol has been demonstrated in granulosa cells, thecal cells, and interstitial gland cells (14). The coexistence of ligand-binding sites and ER in the ovary indicate that estrogen's effects on follicular cells and thecal cells are probably mediated through ER $\beta$  and ER $\alpha$ , respectively. The ER $\beta$  protein appears to be involved in follicular growth and maturation, as disruption of the ER $\alpha$  gene does not prevent the growth and maturation of small follicles (35), which express the ER $\beta$ , but not the ER $\alpha$ , protein. This interpretation is supported by recent findings that ER $\beta$  is down-regulated by gonadotropins in granulosa cells, suggesting the possibility of the physiological role of estrogen action in the ovary mediated by ER $\beta$  (25).

In the present study, we did not detect ER $\alpha$  receptor in oocytes using the ID5 monoclonal antibody. This observation does not exclude the possibility of a presence of  $\alpha$  receptors in oocytes or an effect of estradiol on oocyte maturation. Recent data indicate that murine and human oocyte and cumulus-oocyte complexes express ER $\alpha$  transcripts, suggesting that a paracrine effect of estrogen is exerted on oocyte maturation (36, 37). Furthermore, transcription-independent or nongenomic effects of steroids, which presumably occur through plasma membrane receptors, have been reported (38–40). ER $\alpha$  message has also been detected in purified human granulosa cells, but the findings were not consistent (41). Similarly, ER $\alpha$  protein was not localized to granulosa cells, but has been detected in the granulosa cells of the antral follicles in primates and humans (42–45) and was found only in the P450 aromatase-containing granulosa cells of the antral

follicle in humans (45). Specific binding of estradiol has been demonstrated in granulosa cells (43), and estradiol directly augmented stimulation of granulosa cell aromatase activity by FSH (46). A direct role of estradiol has been suggested in ovarian function in primates and humans (41). As estrogen binds to the ER $\beta$  protein with an affinity and specificity similar to those of ER $\alpha$  protein (22), a role of ER $\beta$  in ovarian tissue cannot be ruled out. On the basis of our findings of ER $\beta$  expression in rat ovary, a specific expression of ER $\beta$  protein can be expected in primate and human ovary.

The present data demonstrate the expression of ER $\beta$  IR in ovarian granulosa cells of growing follicles on postnatal day 5, whereas no ER $\beta$  IR was detected in the ovary on postnatal day 1, which only contains undifferentiated stromal cells and oocytes. In the postnatal day 5 ovary, weak immunoreactivity was observed in some granulosa cells. As follicles grew in size and granulosa cells proliferated to form a multiple layered epithelium, the numbers of ER $\beta$ -positive granulosa cells and their IR increased. An increase in staining intensity could be seen in growing follicles, which is clearly evident in the ovaries of 10- and 20-day-old rats. In contrast, expression of ER $\alpha$  protein was observed in stromal cells on postnatal days 1, 5, and 10; in thecal and interstitial cells of the 20-day-old ovaries; as well as in adult ovary. The developmental expression of ER $\beta$  indicates that the ER $\beta$  protein may be involved in follicular growth during postnatal development.

The expression of transcription factors GATA-4 and GATA-6 mRNA has been investigated in the mouse ovary during development and after hormonal stimulation (47). Abundant expression of GATA-4 mRNA has been detected in granulosa cells of primary and antral follicles, with lesser amounts in thecal cells, interstitial cells, and germinal epi-

thelium. Estrogen stimulation in immature mice has also been shown to increase the expression of GATA-4 and GATA-6 mRNA in granulosa cells (47). The results of this study indicated that GATA-4 and GATA-6 may play a role in the regulation of ovarian development, especially in the maturation and maintenance of follicles (47). As granulosa cells of primary and growing follicles express ER $\beta$  mRNA (19, 22) and ER $\beta$  protein, and the distribution of GATA-4 transcripts and ER $\beta$  protein overlaps in the granulosa cells of primary and growing follicles, ER $\beta$  protein probably interacts with the transcription factor GATA-4 in the regulation of granulosa cell function. Recent studies have indicated that members of the GATA-binding protein family form heterodimers with other GATA-binding proteins (48) and also form complexes with other classes of transcription factors (49, 50), including steroid hormone receptors (51). For example, estrogens exert effects on erythropoiesis by modulating GATA-1 activity through protein-protein interaction with the ER (48). Recent observations also indicate that ER $\beta$  can form a heterodimer complex and that a ER $\beta$ -ER $\alpha$  heterodimer is functionally active in subpopulations of target cells (52, 53). Thus, there is a possibility that ER $\beta$  may interact with GATA-4 through protein-protein interaction to induce some of the cellular functions in granulosa cells, as ER $\beta$  and GATA-4 are coexpressed in granulosa cells.

The present results indicate that ER $\beta$  was exclusively present in granulosa cells of primary and growing follicles, where it probably mediates some of the effects of estrogen action in the regulation of growth and development of the follicles. The differential expression of ER $\alpha$  and ER $\beta$  in specific cell populations of the rat ovary in conjunction with previously reported results of ERKO mice (35) suggests that both ER subtypes, ER $\alpha$  and ER $\beta$ , are essential for normal ovarian function. However, the biological function of the ER $\beta$  subtype is presently still unknown, and future studies of knockout mice with the disrupted ER $\beta$  gene function may provide information needed to understand the physiological action of ER $\beta$ .

### Acknowledgments

We thank Dr. Chris Corton and Dr. Paul Foster for reviewing the manuscript, Ms. Delorise Williams for tissue preparation, Mr. Don Stedman for providing ovarian tissue from 5- and 10-day-old pups, Dr. Barbara Kuyper for editorial assistance, and Ms. Sadie Leak for word processing of the manuscript.

### References

- Korach KS, Migliaccio S, Davis VL 1995 Estrogens. In: Munson PL (ed) *Principles of Pharmacology: Basic Concepts and Clinical Applications*. Chapman and Hall, New York, pp 827–836
- Clark JH, Schrader WT, O'Malley BW 1992 Mechanisms of action of steroid hormones. In: Wilson JD, Foster DW (eds) *Textbook of Endocrinology*. Saunders, New York, pp 35–90
- Evans RM 1988 The steroid and thyroid receptor superfamily. *Science* 240:889–895
- Tsai MJ, O'Malley BW 1994 Molecular mechanisms of steroid/thyroid receptor superfamily members. *Annu Rev Biochem* 63:451–486
- Gorski J, Toft D, Shyamala G 1968 Hormone receptors: studies on the interaction of estrogen with uterus. *Recent Prog Horm Res* 24:45–80
- Jensen EV, Sujuki T, Kawashima T 1968 A two-step mechanism for the interactions of estradiol with rat uterus. *Proc Natl Acad Sci USA* 59:632–638
- Stumpf WE, Sar M 1975 Autoradiographic techniques for localizing steroid hormones. In: O'Malley VW, Hardman JG (eds) *Methods in Enzymology*. Academic Press, New York, vol 36:135–155
- Sar M 1985 Application of avidin biotin technique for the localization of estrogen receptor in target tissues using monoclonal antibodies. In: Bullock GR, Petrusz P (eds) *Techniques in Immunocytochemistry*. Academic Press, New York, vol 3:43–54
- Greene GL, King SB, Jensen WJ 1984 Immunocytochemical studies in estrogen receptors. *J Steroid Biochem* 20:51–56
- Eisenfeld AJ 1970 <sup>3</sup>H-Estradiol in vitro binding to macromolecules from the rat hypothalamus, pituitary and uterus. *Endocrinology* 86:1313–1318
- Jiang MJ, Peng MT 1981 Cytoplasmic and nuclear binding of estradiol in the brain and pituitary of old female rats. *Gerontology* 27:51–57
- Rubin BS, Fox TO, Bridges RS 1986 Estrogen binding in nuclear and cytosolic extracts from brain and pituitary of middle-aged female rats. *Brain Res* 383:60–67
- Stumpf WE 1969 Nuclear concentration of <sup>3</sup>H-estradiol in target tissues. Dry-mount autoradiography of vagina, oviduct, ovary, testis, mammary gland and adrenal. *Endocrinology* 85:31–37
- Stumpf WE, Sar M 1976 Autoradiographic localization of estrogen, androgen, progesterone and glucocorticosteroid in "target tissues." In: Pasqualim J (ed) *Receptors and Mechanisms of Action of Steroid Hormones*. Marcel Dekker, New York, pp 41–81
- Saiduddin S, Milor Jr GE 1971 <sup>3</sup>H-Estradiol uptake by the rat ovary. *Proc Soc Exp Biol Med* 138:651–660
- Richards JS 1975 Estrogen receptor content in rat granulosa cells during follicular development: modification by estradiol and gonadotropins. *Endocrinology* 97:1174–1184
- Saiduddin S, Zassenhaus HP 1977 Estradiol-17 $\beta$ -receptors in the immature rat ovary. *Steroids* 29:197–213
- Kawashima M, Greenwald GS 1993 Comparison of follicular estrogen receptors in rat, hamster and pig. *Biol Reprod* 48:172–179
- Kuiper GGJM, Enmark E, Peltö-Hnikko M, Nilsson S, Gustafsson J-Å 1996 Cloning of a novel estrogen receptor expressed in rat prostate and ovary. *Proc Natl Acad Sci USA* 93:5925–5930
- Tremblay GB, Tremblay A, Copeland NG, Gilbert DJ, Jenkins NA, Labrie F, Giguere V 1997 Cloning, chromosomal localization, and functional analysis of the murine estrogen receptor  $\beta$ . *Mol Endocrinol* 11:353–365
- Koike S, Sakai M, Muramatsu M 1987 Molecular cloning and characterization of rat estrogen receptor cDNA. *Nucleic Acids Res* 15:2499–2513
- Kuiper GGJM, Carlsson B, Grandien K, Enmark E, Haggblad J, Nilsson S, Gustafsson J-Å 1997 Comparison of the ligand binding specificity and transcript tissue distribution of estrogen receptors  $\alpha$  and  $\beta$ . *Endocrinology* 138:863–870
- Chu S, Fuller PJ 1997 Identification of a splice variant of the rat estrogen receptor  $\beta$  gene. *Mol Cell Endocrinol* 132:195–199
- Peterson DN, Tkalecic GT, Koza-Taylor PH, Turi TG, Brown TA 1998 Identification of estrogen receptor  $\beta$ 2, a functional variant of estrogen receptor  $\beta$  expressed in normal rat tissues. *Endocrinology* 139:1082–1092
- Byers M, Kuiper GGJM, Gustafsson J-Å, Park-Sarge O-K 1997 Estrogen receptor- $\beta$  mRNA expression in rat ovary: down regulation by gonadotropins. *Mol Endocrinol* 11:172–182
- Peter H 1969 The development of the mouse ovary from birth to maturity. *Acta Endocrinol (Copenh)* 62:98–116
- Greenwald GS, Roy SK 1994 Follicular development and its control. In: Knobil E, Neill JD (eds) *The Physiology of Reproduction*. Raven Press, New York, vol 1:629–724
- Hsueh AJW, Billig H, Tsafiri A 1994 Ovarian follicle atresia: a hormonally controlled apoptotic process. *Endocr Rev* 15:707–724
- Mor G, Amir-Zaltsman Y, Barnard G, Kohen F 1992 Characterization of an antiidiotypic antibody mimicking the actions of estradiol and its interaction with estrogen receptors. *Endocrinology* 136:363–3640
- Kudolo GB, Elder MG, Myatt L 1984 A novel estrogen-binding species in rat granulosa cells. *J Endocrinol* 102:83–91
- Saunders PTK, Maguire SM, Gaughan J, Millar MR 1997 Expression of estrogen receptor beta (ER $\beta$ ) in multiple rat tissues visualized by immunohistochemistry. *J Endocrinol* 154:R13–R16
- Sar M, Welsch F 1997 Immunocytochemical localization of estrogen receptor  $\beta$  in ovary, and prostate of prepubertal and adult Sprague-Dawley rats. 4th NIH/NIEHS Conference on Estrogens in the Environment, Linking Fundamental Knowledge, Risk Assessment and Public Policy. Arlington, VA, July 20–23, 1997 (Abstract), p 39
- Welsch F, Sar M 1998 The expression of estrogen receptor  $\beta$  protein in rat prostate and epididymis. *Toxicol Sci* 42:164 (Abstract)
- Couse JF, Lindzey J, Grandien K, Gustafsson J-Å, Korach KS 1997 Tissue distribution and quantitative analysis of estrogen receptor  $\alpha$  (ER $\alpha$ ) and estrogen receptor  $\beta$  (ER $\beta$ ) messenger ribonucleic acid in the wild-type and ER $\beta$  knockout mouse. *Endocrinology* 138:4613–4621
- Lubahn DB, Moyer JS, Golding TS, Couse JF, Korach KS, Smithies O 1993 Alteration of reproductive function but not prenatal sexual development after insertional disruption of the mouse estrogen receptor gene. *Proc Natl Acad Sci USA* 90:11162–11166
- Wu T-CJ, Wang L, Wan Y-JY 1992 Expression of estrogen receptor gene in mouse oocyte and during embryogenesis. *Mol Reprod Dev* 33:407–412
- Wu T-CJ, Wang L, Wan Y-JY 1993 Detection of estrogen receptor messenger



- ribonucleic acid in human oocytes and cumulu-oocyte complexes using reverse transcriptase-polymerase chain reaction. *Fertil Steril* 59:54–59
38. **Nemere I, Zhou L-X, Norman AW** 1993 Nontranscriptional effects of steroid hormones. *Receptor* 3:277–291
  39. **Morley P, Whitfield JF, Vanderhyden BC, Tsang BK, Schwartz J-L** 1992 A new, nongenomic estrogen action: the rapid release of intracellular calcium. *Endocrinology* 131:1305–1312
  40. **Wheling M** 1994 Nongenomic actions of steroid hormones. *Trends Endocrinol Metab* 5:347–353
  41. **Chaffin CL, Heimler I, Rawlins RG, Wimpee BAB, Sommer C, Hutz RJ** 1996 Estrogen receptor and aromatic hydrocarbon receptor in the primate ovary. *Endocrine* 5:315–321
  42. **Hild-Petito, Stouffer RL, Brenner RM** 1988 Immunocytochemical localization of estradiol and progesterone receptors in the monkey ovary throughout the menstrual cycle. *Endocrinology* 123:2896–2905
  43. **Hutz RJ, Wagner N, Krause P, Fisher C, Syed N, Dierschke DJ, Monniaux D, Tomanek M** 1993 Localization of estrogen receptors in rhesus monkey ovary. *Am J Primatol* 31:299–309
  44. **Iwai T, Nanbu Y, Iwai M, Fujii S, Mori T** 1990 Immunocytochemical localization of oestrogen receptors and progesterone receptors in the human ovary throughout the menstrual cycle. *Virchows Arch Pathol Anat* 417:369–375
  45. **Suzuki T, Sasano H, Kimura N, Tamura M, Fukaya** 1994 Immunohistochemical distribution of progesterone, androgen and oestrogen receptors in the human ovary during the menstrual cycle: relationship to expression of steroidogenic enzymes. *Hum Reprod* 9:1589–1595
  46. **Adashi EY, Hsueh AJ** 1982 Estrogens augment the stimulation of ovarian aromatase activity by follicle-stimulating hormone in cultured rat granulosa cells. *J Biol Chem* 257:6077–6083
  47. **Heikinheimo M, Ermolaeva B, Rahman NA, Narita N, Huhtaniemi IT, Tap-  
anainen JS, Wilson DB** 1997 Expression and hormonal regulation of trans-  
cription factors GATA-4 and GATA-6 in the mouse ovary. *Endocrinology*  
138:3505–3514
  48. **Crossley M, Merika M, Orkin SH** 1995 Self-association of the erythroid  
transcription factor GATA mediated by its zinc finger domains. *Mol Cell Biol*  
15:2448–2456
  49. **Merika M, Orkin SH** 1995 Functional synergy and physical interaction of the  
erythroid transcription factor GATA-1 with Kruppel family proteins Sp1 and  
EKLF. *Mol Cell Biol* 15:2437–2447
  50. **Osada H, Grutz G, Axelson H, Forster A, Rabbitts TH** 1995 Association of  
erythroid transcription factors: complexes involving the LIM protein RBTN2  
and zinc-finger protein GATA1. *Proc Natl Acad Sci USA* 92:9585–9589
  51. **Blobel GA, Sieff CA, Orkin SH** 1995 Ligand-dependent repression of the  
erythroid transcription factor GATA-1 by the estrogen receptor. *Mol Cell Biol*  
15:3147–3153
  52. **Patterson K, Grandien K, Kuiper GGJM, Gustafsson J-Å** 1997 Mouse es-  
trogen receptor  $\beta$  forms estrogen response element-binding heterodimers with  
estrogen receptor  $\alpha$ . *Mol Endocrinol* 11:1486–1496
  53. **Cowley SM, Hoare S, Mosselman S, Parker MG** 1997 Estrogen receptors  $\alpha$   
and  $\beta$  form heterodimers on DNA. *J Biol Chem* 272:19858–19862
